# Supplementary material for: Layer-by-layer construction of an oxygen-generating photo-responsive nanomedicine for enhanced photothermal and photodynamic combination therapy
Source: Royal Society of Chemistry journal article supplement (doi:10.1039/c9cc01461f), 2019-01-01
Supplement: c9cc01461f1.pdf [file c9cc01461f1.pdf]

## Supplementary Information

### **Layer-by-layered construction of oxygen-generating photo-responsive nanomedicine for enhanced photothermal and photodynamic combination therapy**

Baoji Du, Weiqi Zhang, Ching-Hsuan Tung

Molecular Imaging Innovations Institute, Department of Radiology, Weill Cornell Medicine, New York, NY, United States

\*Corresponding author

Email: [cht2018@med.cornell.edu](mailto:cht2018@med.cornell.edu) (C.-H Tung)

## Materials

Gold (III) chloride trihydrate ( $\text{HAuCl}_4$ ), hydrogen peroxide ( $\text{H}_2\text{O}_2$ ), Polyethylenimine MW 25,000 (PEI) and acridine orange hydrochloride hydrate (AO) were obtained from Sigma-Aldrich (St. Louis, MO, USA). Hoechst 33342, singlet oxygen sensor green (SOSG) and LysoTracker Green DND-26 were purchased from Thermo Fisher (Waltham, MA, USA). Tris(bipyridine)ruthenium(II) chloride ( $[\text{Ru}(\text{dpp})_3]\text{Cl}_2$ , RDPP) and Chlorin e6 (Ce6) were purchased from Cayman Chemical (Ann Arbor, MI, USA). Potassium permanganate ( $\text{KMnO}_4$ ) was obtained from VWR (Philadelphia, PA, USA). (4-(2-hydroxyethyl)-1-piperazineethanesulfonic acid) (HEPES) were purchased from Amresco (Solon, OH, USA). Hyaluronic acid (HA), MW 1000,000 and Hyaluronic acid, MW 40,000 ( $\text{HA}_{40\text{K}}$ ) was obtained from LifeCore (Chaska, MN, USA).

## Preparation for AMP-Ce6-HA

AMP-Ce6-HA was prepared by layer-by-layer assembly. The core gold nanostar (AuNS) was prepared by mixing  $\text{HAuCl}_4$  (0.1 M, 20  $\mu\text{L}$ ) and HEPES (0.1 M, 10 mL) at room temperature for 24 h. The formed AuNS was centrifuged down at 13,000 rpm for 10 min. The collected AuNS was re-suspended in ddH<sub>2</sub>O (5 mL) and then reacted with  $\text{KMnO}_4$  (5 mg/mL, 50  $\mu\text{L}$ ) for 1 h. PEI (50 mg/mL, 100  $\mu\text{L}$ ) was added to the reaction mixture and reacted for additional 2 h. For thicker  $\text{MnO}_2$  coating experiment, a higher amount of  $\text{KMnO}_4$  (5 mg/mL, 250  $\mu\text{L}$ ) and PEI (50 mg/mL, 250  $\mu\text{L}$ ) was used. The prepared AuNS@ $\text{MnO}_2$ -PEI (AMP) was collected by centrifugation (13,000 rpm, 10 min). AMP was then suspended in Tris HCl buffer (pH 8.5, 10 mM, 5 mL). A mixture of Ce6 (1 mM, 50  $\mu\text{L}$ ) and HA (10 mg/mL, 50  $\mu\text{L}$ ) was added to the AMP solution and vortexed for 2 days. The formed AMP-Ce6-HA was also centrifuged at 13,000 rpm for 10 min. The leftover Ce6 in the supernatant was determined by absorbance, then the Ce6 loading ratio was determined. The obtained AMP-Ce6-HA was res-suspended in phosphate buffer (10 mM, pH 8.5) and stored at 4 °C.

## Characterization of AuNS, AMP and AMP-Ce6-HA

Transmission electronic microscope (TEM) images were acquired by TEM (JEM-1400, JEOL, Tokyo, Japan) at the voltage of 120 kV. Hydrodynamic sizes were measured by Malvern Zetasizer Nano-S (Malvern, UK). Zeta potentials were characterized by Zeta PALS analyzer (Brookhaven Instruments, Holtsville, NY, USA). Absorption spectra were obtained by UV-Vis Spectrophotometer (Agilent Technologies, Santa Clara, CA, USA). Photothermal effect was evaluated by 808 nm laser (Civillaser, NaKu Technology Co., Ltd, Hangzhou, China)

## Photothermal effect evaluation for AMP-Ce6-HA

Different concentrations (0, 4, 12, 20  $\mu\text{g}/\text{mL}$ ) of AMP-Ce6-HA solution (1 mL) were irradiated by 808 nm laser with a light density of 3.0  $\text{W}/\text{cm}^2$  to investigate AMP-Ce6-HA concentration-dependent photothermal effect. Similarly, the AMP-Ce6-HA solution (20  $\mu\text{g}/\text{mL}$ , 1 mL) was irradiated by different densities of laser power (0.5, 1.0, 2.0, 3.0  $\text{W}/\text{cm}^2$ ) to evaluate the laser power-dependent photothermal effect. During the irradiation, the solution temperatures were detected by the thermometer (Traceable, VWR, New York, NY, USA) and recorded every 30 s.

## pH- and $\text{H}_2\text{O}_2$ -responsive AMP-Ce6-HA decomposition

AMP-Ce6-HA decomposition was evaluated by monitoring the absorbance of 380 nm at different time points. AMP-Ce6-HA (0.8 mg/mL, 10  $\mu\text{L}$ ) was added into pH 7.4, pH 6.5 or pH 5.0 PB buffers (100  $\mu\text{L}$ ) to study the pH-responsive decomposition. In order to measure the  $\text{H}_2\text{O}_2$ -responsive decomposition, AMP-

Ce6-HA (0.8 mg/mL, 10  $\mu$ L) was dissolved into PB buffers (pH 6.5, 100  $\mu$ L) with different H<sub>2</sub>O<sub>2</sub> concentrations (0, 10, 50, 100  $\mu$ M). Then, the absorbance intensities at 380 nm were recorded at corresponding time points by plate reader (Infinite M1000 Pro, Tecan, Switzerland).

### **Singlet oxygen detection**

Singlet oxygen was detected by SOSG prober. For pH-mediated singlet oxygen generation, AMP-Ce6-HA (0.8 mg/mL, 10  $\mu$ L) with SOSG (5  $\mu$ M) was in PB buffers (100  $\mu$ L) of different pH (pH 7.4, 6.5 and 5.0). To detect the H<sub>2</sub>O<sub>2</sub>-associated singlet oxygen, AMP-Ce6-HA (0.8 mg/mL, 10  $\mu$ L) was dissolved into SOSG prober-included (5  $\mu$ M) PB buffers (pH 6.5, 100  $\mu$ L) with different concentrations of H<sub>2</sub>O<sub>2</sub> (0, 10, 50 and 100  $\mu$ M). After irradiating these samples for corresponding time, fluorescence intensities of SOSG prober were read by plate reader (ex: 504 nm, em: 520 nm).

### **Cell uptake for AMP-Ce6-HA**

AMP-Ce6-HA (0.8 mg/mL, 2.5  $\mu$ L) was co-incubated with MDA-MB-231 cells in DMEM+FBS medium (100  $\mu$ L) for 24 h, 8 h or 4 h, respectively. Free hyaluronic acid competition experiment was performed to confirm the target ability. The cells were pre-treated by HA<sub>40K</sub> (1 mg/mL) for 2 h, then AMP-Ce6-HA (0.8 mg/mL, 2.5  $\mu$ L) was added into the medium (100  $\mu$ L) and co-cultured for another 24 h. Finally, all fluorescence images were acquired at Chlorin e6 channel (ex: 628/40, em: 692/40) by EVOS microscopy.

### **Intracellular localization AMP-Ce6-HA**

MDA-MB-231 cells (100  $\mu$ L medium per well) were co-incubated with AMP-Ce6-HA (0.8 mg/mL, 2.5  $\mu$ L) for 24 h. Then, lyso-tracker green (final concentration: 1  $\mu$ M) was added into the medium and incubated for 1 h, followed by 2 min incubation with Hoechst (final concentration: 0.1  $\mu$ g/mL). Finally, the fluorescence images were obtained at DAPI channel (ex: 357/44, em: 447/60), GFP channel (ex: 470/22, em: 510/42), and CY5 channel (ex: 628/40, em: 692/40) for nucleus, lysosome and Ce6, respectively.

### **Phototherapy for MDA-MB-231 cancer cells**

For PDT, MDA-MB-231 cells were seeded into 96 well plate (12,000 cells/well) and cultured for 24 h. Different concentrations of AMP-Ce6-HA (final concentration: 0, 4, 8, 12, 16, 20  $\mu$ g/mL) or Ce6 (final concentration: 0, 0.25, 0.5, 0.75, 1.0, 1.25  $\mu$ M) was added and incubated for 4, 8 or 24 h. The cells were washed and then irradiated by light (650 nm, 30 mW/cm<sup>2</sup>) for 90 s. For PTT, the cells were co-incubated with AMP-Ce6-HA (0, 4, 12, or 20  $\mu$ g/mL) for 4, 8 or 24 h. The cells were washed and then irradiated with 808 nm laser (3 W/cm<sup>2</sup>) for 10 min. For combination of PDT and PTT, the cells pre-treated by AMP-Ce6-HA (12  $\mu$ g/mL) for 24 h were first irradiated by 650 nm light (30 mW/cm<sup>2</sup>) for 90 s, and then by 808 nm light (3 W/cm<sup>2</sup>) for 10 min. The cell viability was evaluated 16 hours later by CCK-8 viability kit.

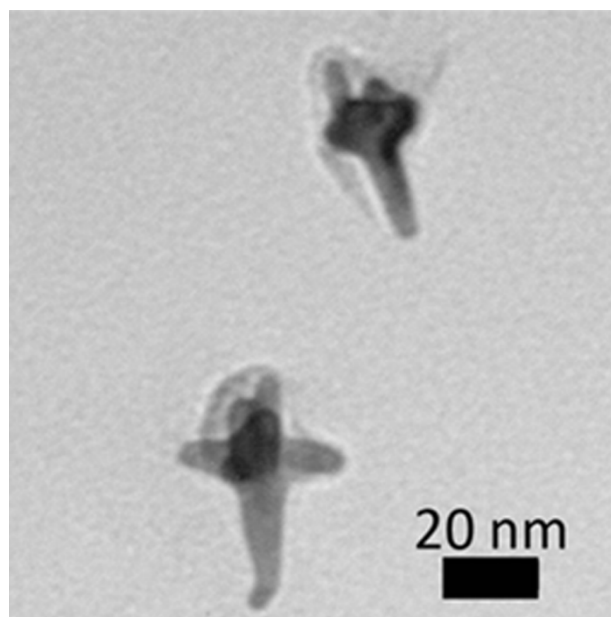

Fig. S1. TEM image of AMP prepared with  $\text{KMnO}_4$  (0.05 mg/mL) and PEI (1.0 mg/mL).

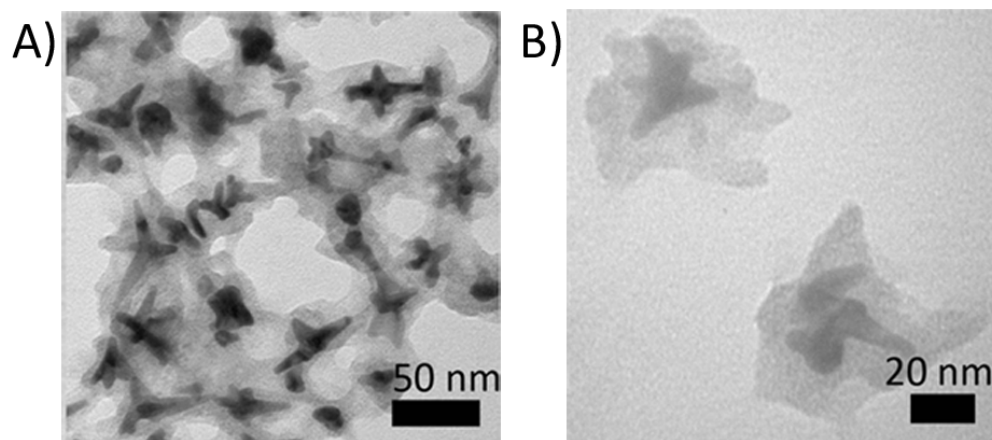

Fig. S2. TEM image of AMP prepared with high concentrations of  $\text{KMnO}_4$  (0.25 mg/mL) and PEI (2.5 mg/mL).

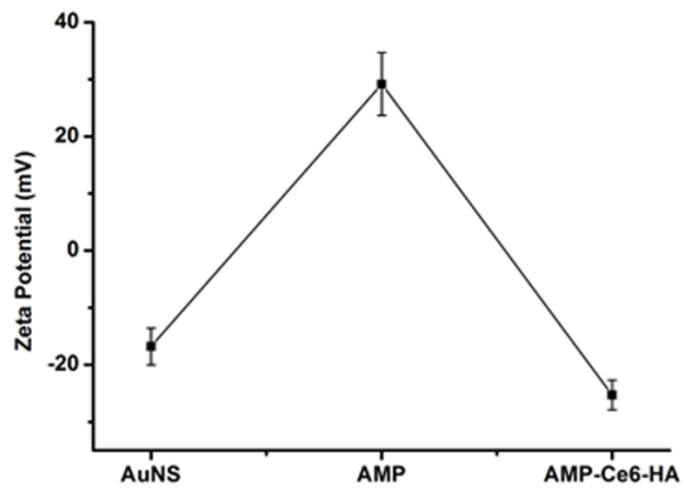

Fig. S3. Zeta potentials of AuNS, AMP and AMP-Ce6-HA.

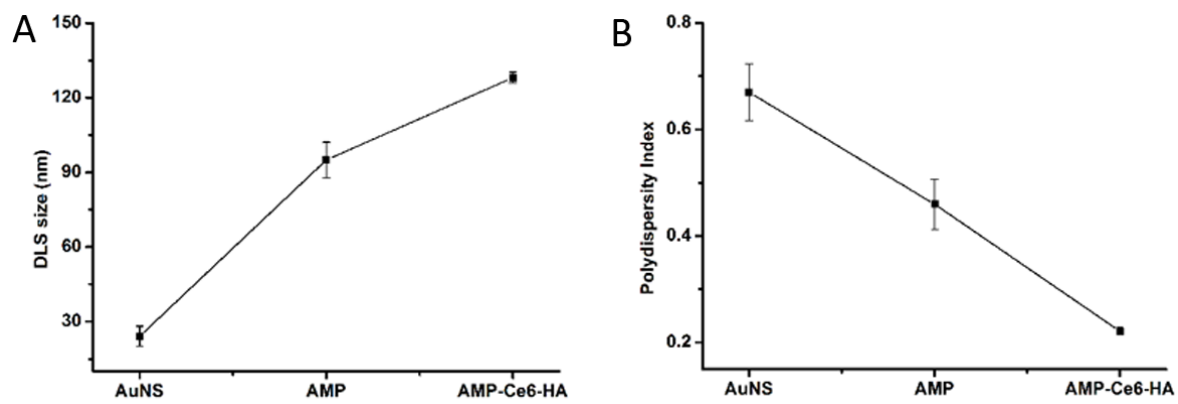

Fig. S4. DLS sizes (A) and PDIs (B) of AuNS, AMP and AMP-Ce6-HA.

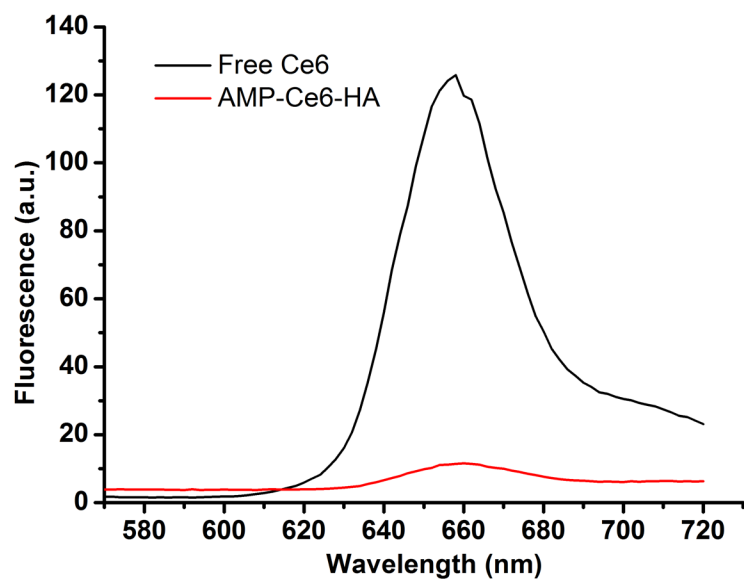

Fig. S5. Fluorescence of spectra of Ce6 (1  $\mu$ M) before and after being loaded into nanoparticles.

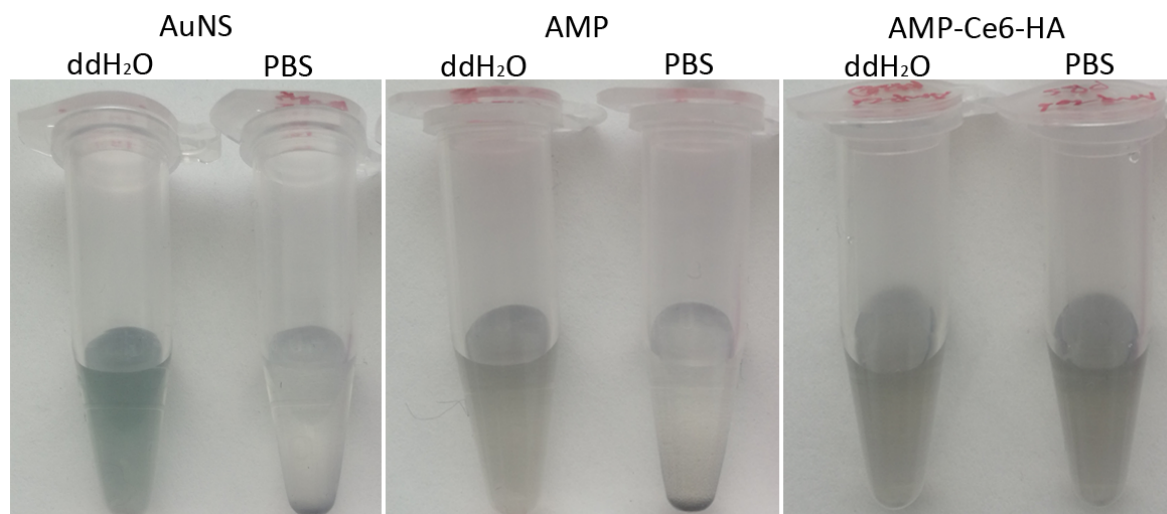

Fig. S6. Digital images of AuNS, AMP and AMP-Ce6-HA in ddH<sub>2</sub>O or PBS for 24 h. Note the aggregation of AuNS and AMP in PBS.

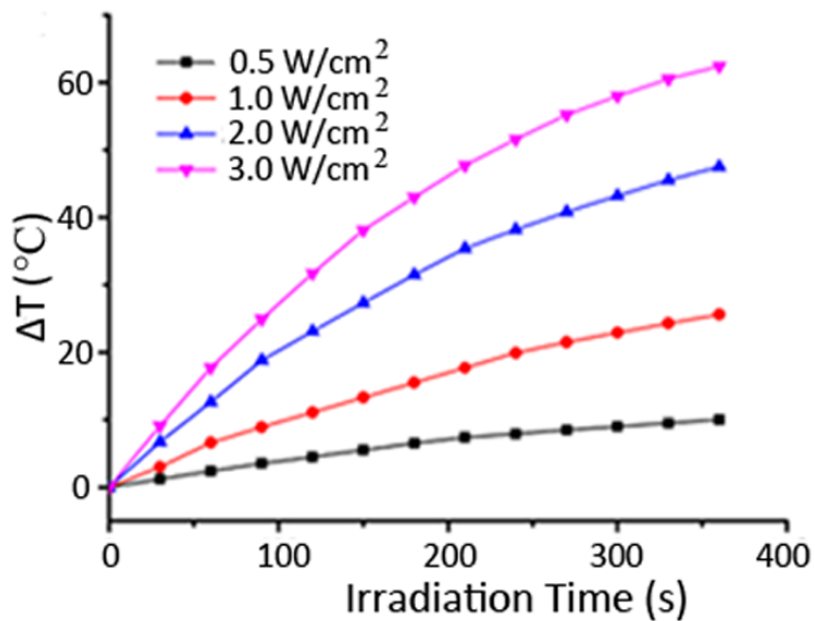

Fig. S7. Laser power-dependent temperature change at 20 µg/mL of AMP-Ce6-HA aqueous solution.

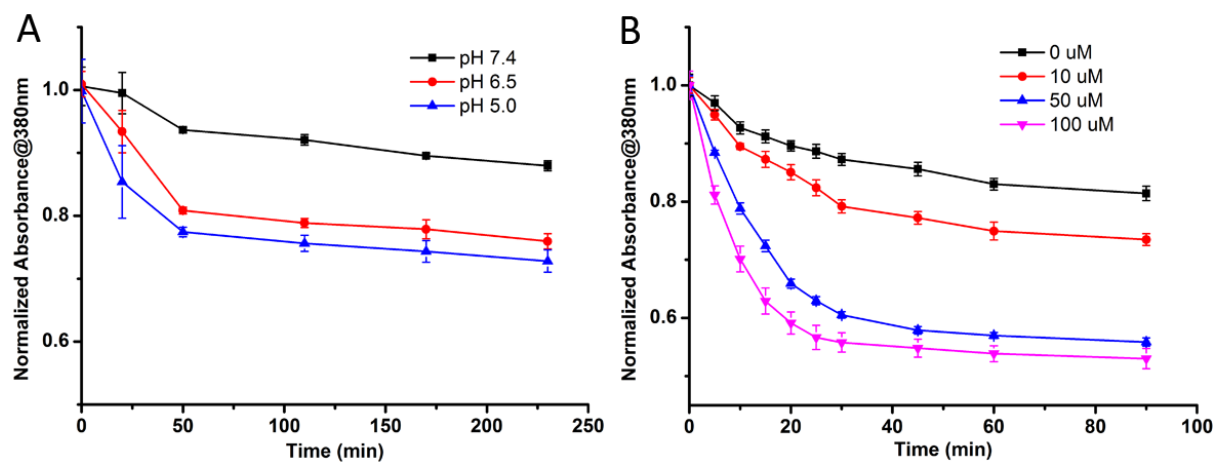

Fig. S8. A) Normalized absorption change at 380 nm of AMP-Ce6-HA in pH 7.4, 6.5 or 5.0 buffer for different time. B) Normalized absorption change at 380 nm of AMP-Ce6-HA in pH 6.5 buffer containing different concentrations of H<sub>2</sub>O<sub>2</sub>.

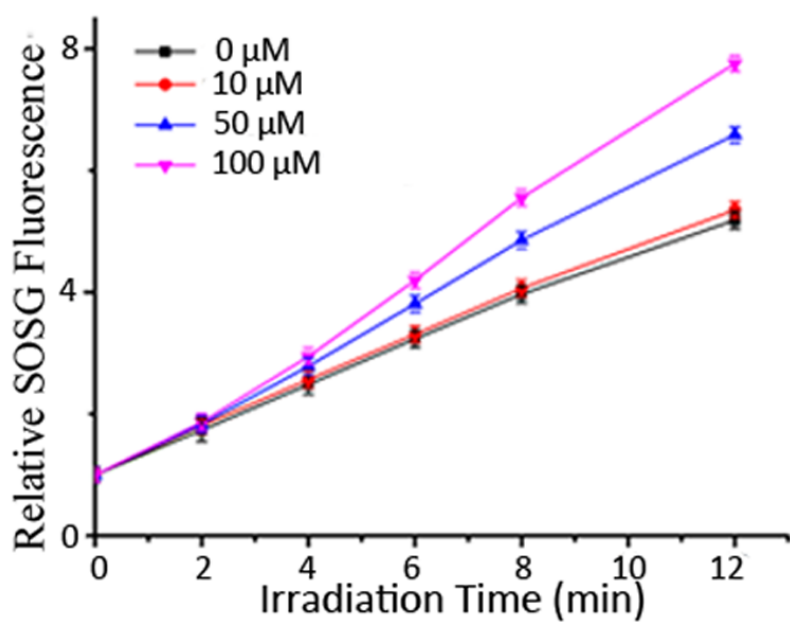

Fig. S9. Relative SOSG fluorescence of AMP-Ce6-HA with  $\text{H}_2\text{O}_2$  (0 - 100  $\mu\text{M}$ , pH 6.5) after irradiation (650 nm light, 30 mW/cm<sup>2</sup>).

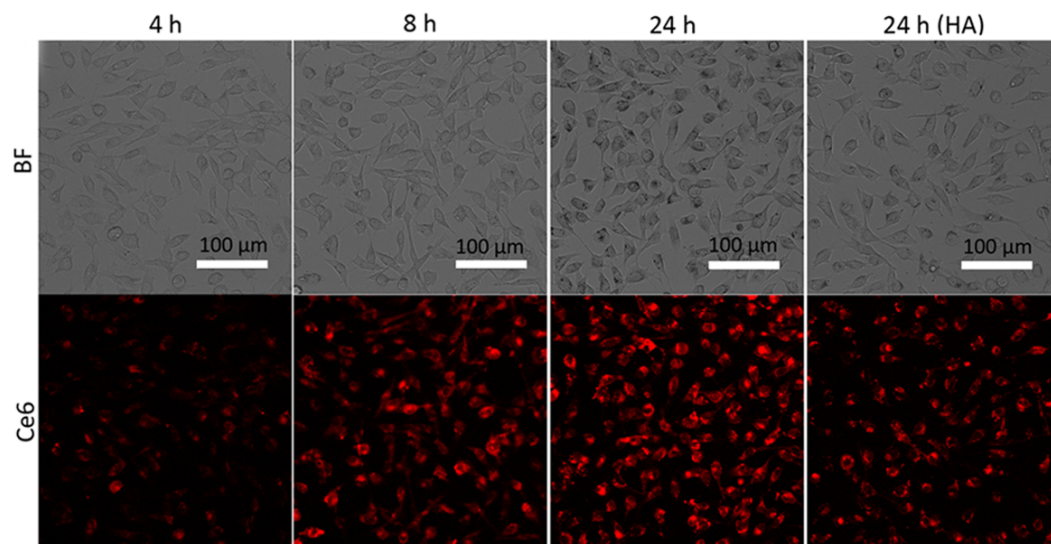

Fig. S10. Bright field (BF) and fluorescence (Ce6) images of MDA-MB-231 cells with AMP-Ce6-HA (20  $\mu\text{g/mL}$ ) for 4 h, 8 h or 24 h without free HA, as well as 24 h with free HA addition (1 mg/mL).



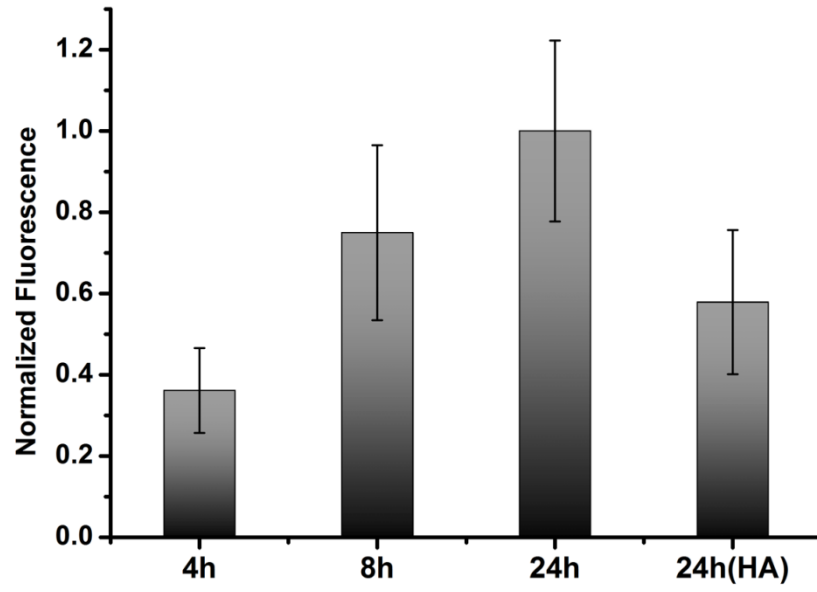

Fig. S11. Normalized Intracellular fluorescence of MDA-MB-231 cells after being incubated with AMP-Ce6-HA at different time points in HA-free or HA-supplemented (HA concentration: 1 mg/mL) medium.

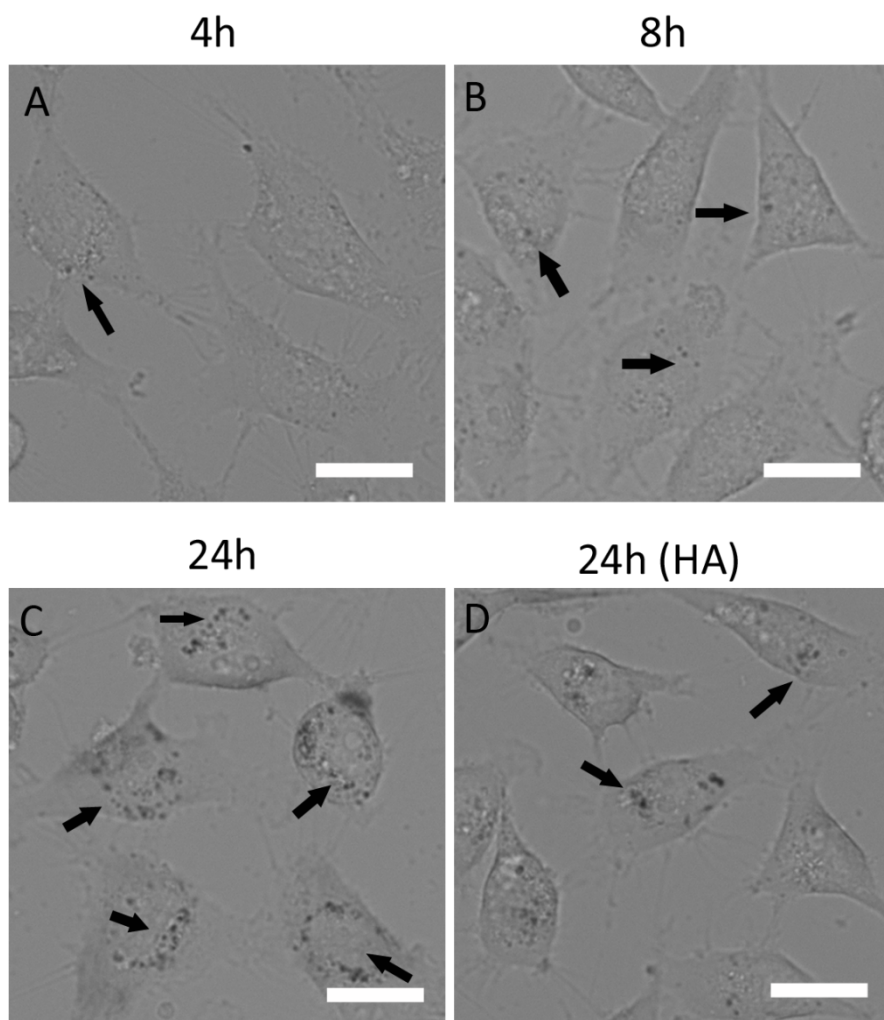

Fig. S12. Bright field (BF) images of MDA-MB-231 cells after being incubated with AMP-Ce6-HA (20  $\mu\text{g}/\text{mL}$ ) for 4 h, 8 h or 24 h without HA, as well as 24 h with excess of free HA (1  $\text{mg}/\text{mL}$ ). Scale bar is 20  $\mu\text{m}$ .

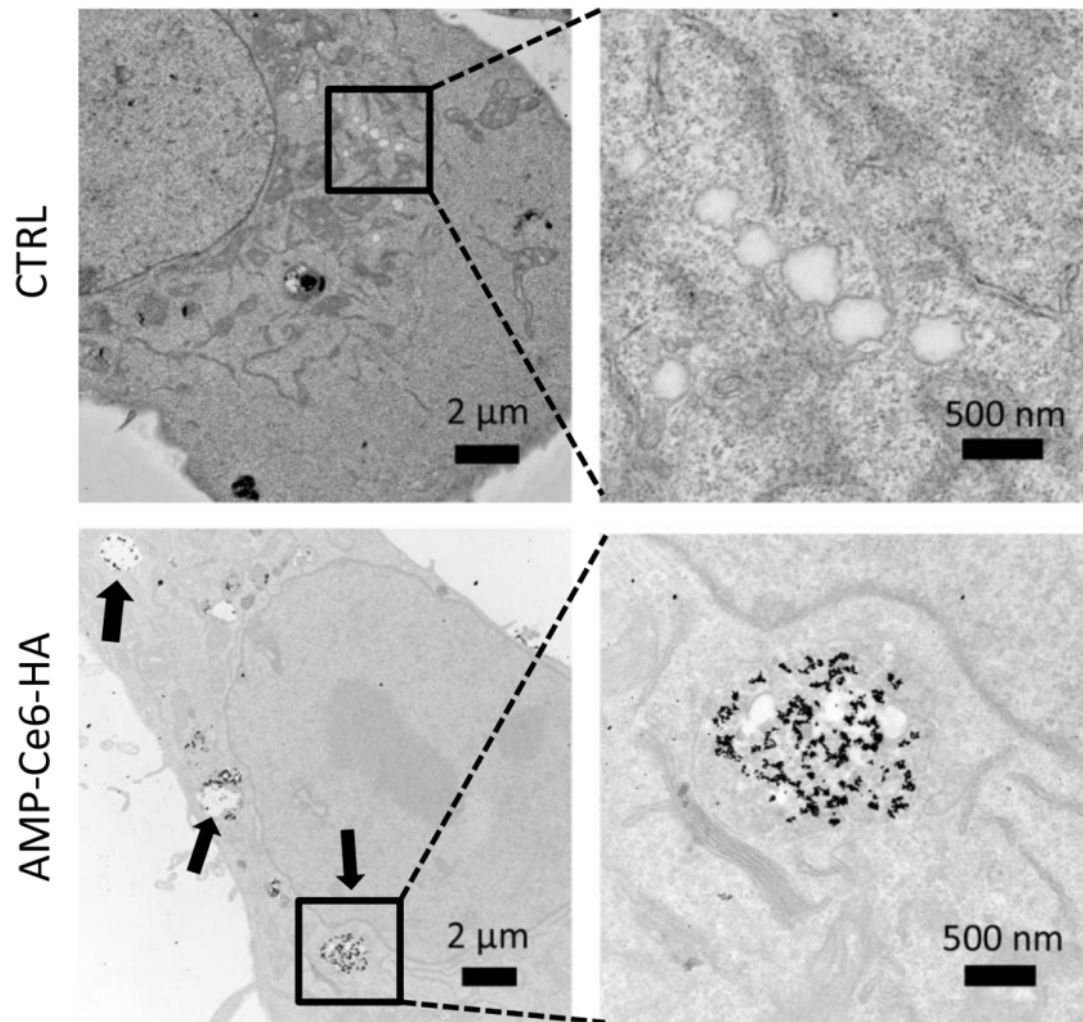

Fig. S13. TEM images for MDA-MB-231 cells incubated with or without AMP-Ce6-HA for 24 h.

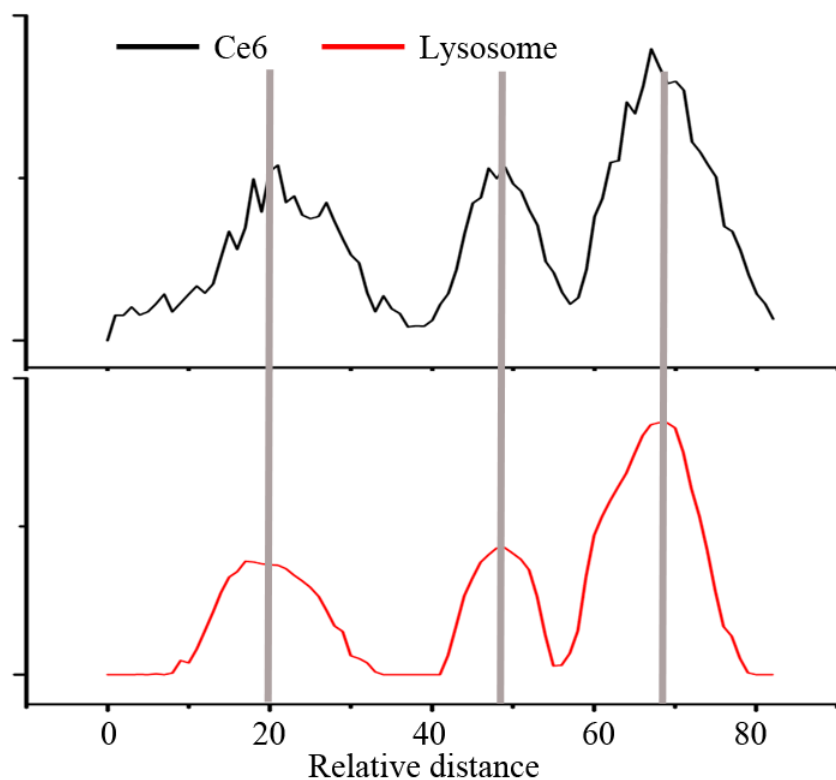

Fig. S14. Spatial fluorescence intensity of Ce6 and Lysosome (AO) image across the marked line in Figure 3C.

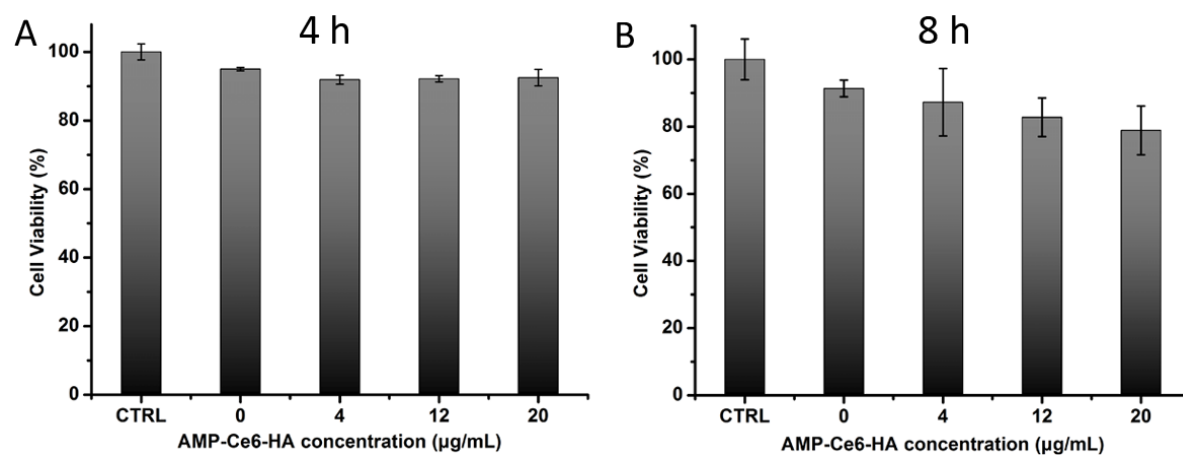

Fig. S15. PTT effect of AMP-Ce6-HA in cells viability. MDA-MB-231 cells were incubated with different concentrations of AMP-Ce6-HA for A) 4 h and B) 8 h, and then irradiated by 808 nm light ( $3 \text{ W/cm}^2$ ) for 10 min.

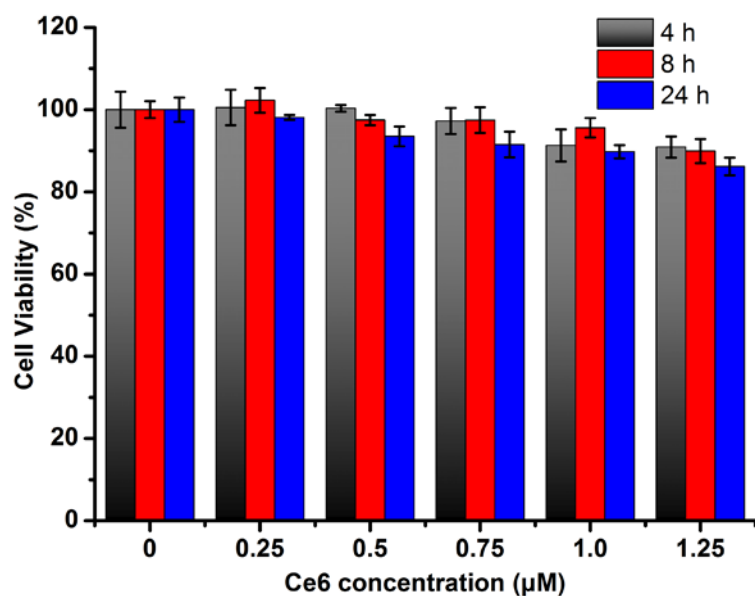

Fig. S16. PDT effect of free Ce6 in cells viability. MDA-MB-231 cells were incubated with Ce6 of different concentrations for 4 h, 8 h or 24 h, and then irradiated by 650 nm light ( $30 \text{ mW/cm}^2$ ) for 90 s.
